# Supplementary material for: A new version of the CABLE land surface model (Subversion revision r4546), incorporatingland use and land cover change, woody vegetation demography and a novel optimisation-basedapproach to plant coordination of electron transport and carboxylation capacity-limitedphotosynthesis
Source: Copernicus journal article supplement (doi:10.5194/gmd-2017-265), 2017-12-22
Supplement: Supplementary file [file gmd-2017-265-AC1-supplement.pdf]

## Authors' Response to Referee Comments: gmd-2017-265

### Reviewer 2

#### Comment 1.1.

Haverd and collaborators present and evaluate the latest developments for the land surface model CABLE. The manuscript contains the information that is expected in such a study and the structure of the manuscript is good. The figures and tables support the text but the text itself is often too concise which hampers the readability of the manuscript. I made several specific comments to underpin my opinion but I would like to encourage the authors to carefully go through the manuscript and check every paragraph, even those not mentioned in my comments.

Contrary to the text itself, the title is too wordy. A shorter alternative could be "Incorporating gross land cover change, tree-demography and a novel optimization-based photosynthesis in CABLE land surface model (revision 4546)". The words that will no longer be in the title could be moved to the keywords. Words already in the title should not be repeated as keywords as they will result in new hits from search engines.

#### Response 1.1.

We thank Reviewer 1 for the positive general comments and have addressed the conciseness of the text in subsequent comments (1.2, 1.3, 1.5 1.7 1.10 1.12 1.19).

We have shortened the title to:

"A new version of the CABLE land surface model (Subversion revision r4546), incorporating land use and land cover change, woody vegetation demography and a novel optimisation-based approach to plant coordination of photosynthesis."

#### Comment 1.2.

P4, L16. "is inconsistent with the Co-ordination Hypothesis". Rephrase or better explain. The logic of this sentence appears twisted. As I read this sentence it says that the co-ordination hypothesis differs from the hypothesis that the ratio between  $V_{max}$  and  $J_{max}$  is constant, which seems trivial given that the Co-ordination hypothesis was established as an alternative for the fixed-hypothesis. It is more relevant for the reader to be informed whether the co-ordination hypothesis is or isn't at odds with the data.

#### Response 1.2

In the line above, we stated that data confirm the Co-ordination Hypothesis: "This so-called Co-ordination Hypothesis was originally proposed by Chen et al. (1993) and has been verified experimentally by Maire et al. (2012)." We have modified the sentence in question to emphasise poorly appreciated impact of neglecting co-ordination on simulated sensitivity of GPP to CO<sub>2</sub> as follows:

"In this work, we will show that the assumption of a temporally invariant ratio of Rubisco and electron-transport capacities (at standard temperature), adopted in Prior CABLE and typically in other LSMs, is not only inconsistent with the Co-ordination Hypothesis, but introduces large uncertainty in simulated sensitivity of GPP to atmospheric CO<sub>2</sub> concentration."

#### Comment 1.3.

The explanation of the structure of the model would likely benefit from adding a simplified flowchart-type of figure showing the main dependencies. The actual approaches are often missing and should be added to the text. How is, for example, the radiation transfer through the canopy simulated? Describe the approach in a few words (i.e. "Lambert-Beer extinction relationship"), try to add some of the key assumptions (i.e. "single-layer energy budget combining the energy budget of the soil and vegetation") to help other land surface modelers to get a rough idea of the core of CABLE.

#### Response 1.3

We appreciate the reviewer's suggestion and further note that comprehensive documentation of the processes encoded in CABLE is restricted to papers that separately describe CABLE biophysics or CABLE biogeochemistry or CABLE population dynamics. To address this we now provide Figure 1 which illustrates how the different model components interact and Figure S1 which gives pseudo code for all the key processes, as a useful reference for what is actually in the CABLE code, as well as highlighting the new developments in this work and how they interact with pre-existing components.

#### Comment 1.4.

P5, Section 3.1. A schematic of POP (along the lines of fig 2 in doi:10.1002/grl.50972) could help the reader to better understanding of what this module does without having to consult the original publication in Biogeosciences.

#### Response 1.4

We agree and note that the requested information is now in Figures 1 and S1. (See Response 1.3).

#### Comment 1.5.

P7, L 16, e.f. Acronyms for the PFTs are introduced here. These acronyms are only used a couple of times throughout the text but not enough to accommodate the reader to their meaning. Omit the acronyms and write in full (also in Table 1) for the sake of readability.

#### Response 1.5:

We appreciate the helpful comment and have removed the acronyms.

#### Comment 1.6.

P8, L21. Reword. Despite being familiar with modeling land cover changes I don't understand which process is described here.

#### Response 1.6

We have extended the sentence to be very clear that the net biomass loss in secondary forest also has contributions from natural disturbance and expansion:

“Carbon losses by secondary forest harvest and clearing need to be resolved from net biomass loss in secondary forest tiles, which also includes components from natural disturbance and areal expansion.”

#### Comment 1.7

P9, Section 3.4. The style and information content of this section is very different from the previous paragraphs under section 3. Sections 3.1 to 3.3 are descriptive and do not present any of the equations. Section 3.4 lists the equations with little description. If sections 3.1 to 3.3 are a summary of model developments that have already been published and section 3.4 is a complete new model approach the change in style may be justified. This should be made explicit. I read section 3.4 twice but I could not figure out how this new approach was implemented (in other words, the description would be of little help to write a working code). Another schematic combined with more explanations may help.

#### Response 1.7

Regarding the change in style between the POP and POP-LUC descriptions and the OptJV description, we (i) emphasised that POP equations have already been published and (ii) inserted equations for POPLUC.

In Section 3.1 we now emphasise:

“The summary below is reproduced from these papers, which describe POP in detail and with full equations.”

The section of the LUC code that is enhanced by equations is that describing the redistribution of carbon (Section 3.2) This has been modified as follows:

#### “Re-distribution of carbon stocks following land-use-change

Changes in pools sizes of biomass, soil and litter carbon in the biogeochemical module are updated to reflect the areal changes from gross land-use transitions. Analogous updates occur for nitrogen pools. The mass balance equation for each carbon pool  $c_j$  in each land-use tile  $L$ , with area  $A_L$  that accounts for the possibility of more than one gross receiver ( $r$ ) or donor ( $d$ ) transition to or from the tile, is:

$$c_{j,L,0} A_{L,0} - c_{j,L,0} \Delta A_{L,d} + F_{j,L,r}^{transfer} \Delta t = c_{j,L} (A_{L,0} + \Delta A_L) \quad (1)$$

Here  $j=1-9$  (referring to carbon in leaf, wood, fine roots, 3 litter pools and 3 soil pools) and  $L = 1-3$  (referring to primary woody, secondary woody, open. In Equation (1), the first term on the LHS is the carbon stock prior to land-use perturbations; the second term is the carbon lost from the tile due to donor transitions (transitions from the  $L$  tile) and the third term is the carbon gained by receiver transitions (transitions to the  $L$  tile). The term on the RHS is the carbon

stock following the perturbations (i.e. the product of the new carbon density and the new tile area).

The flux of carbon due to receiver transitions is generally:

$$F_{j,L,r}^{transfer} = \sum_{k=1}^{n_{trans}} \Delta A_k c_{j,k} \quad (2)$$

where the total transfer of carbon is summed over all possible gross transitions ( $n_{trans} = 4$ ), and each transition contributes carbon to the receiver pool that is equal to the product of the

transition area  $\Delta A_k$  multiplied by the carbon density of the donor pool  $c_{j,k}$ . An exception to

Equation (2) is the transfer of carbon the coarse woody debris pool and fine structural litter as the result of clearing or wood harvest: woody biomass residue from harvest and clearing augments the coarse woody debris pool, whereas leaf and fine-root residue augment the fine structural litter pool. In the case of secondary forest, harvest and clearing are age-selective, which means that biomass loss and litter increment are affected not only by cleared/harvested secondary forest area, but also by the age distribution of the stems that are removed. Harvested and cleared biomass that is not left as residue is extracted into three product pools with turnover rates of 1 y, 10 y and 100 y. Coefficients for allocation to these product pools, as well as the fractions of harvested and cleared biomass that remain in the landscape as litter are prescribed following Hansis et al. (2015)."

We appreciate the comment about Section 3.4. Pseudo code for the new algorithm now appears in Figure S1. The text describing the method for dynamically optimizing  $J_{max}/V_{cmax}$  has been expanded, made clearer, and linked to Figure 1, so that a reader could indeed make use of this text to construct a working code. The clarified text (Section 3.4) now reads:

#### **“Dynamic optimization of $b_{JV}$ : method**

The method for implementing these assumptions in CABLE is:

- (i) Maintain a 5-day history of subdiurnal leaf-level meteorology (absorbed PAR; leaf-air VPD difference; leaf temperature,  $c_s$ ) for sun-lit and shaded leaves, such that  $A_{n,5d}$  can be reconstructed for sunlit and shaded leaves. Other subdiurnal variables that are required are  $R_d$  (Eq (4)),  $f_{wsoil}$  (Eq (9)) and a scaling parameter that relates leaf-level  $J_{max}$ ,  $V_{cmax}$  and  $R_d$  to their effective “big-leaf” sunlit and shaded values via integration of these parameters over canopy depth under the assumption that the leaf-level values are proportional to leaf nitrogen which decreases exponentially from canopy top (Wang and Leuning, 1998 (Eqs C6 and C7)).
- (ii) Construct a function that calculates leaf nitrogen cost per unit net photosynthesis ( $N_{eff}/A_{n,5d}$ ). Inputs to this function are: (1) current estimate of  $b_{JV}$ ; (2)  $N_{eff}$  (Eq (10)); (3) 5-day history of subdiurnal leaf-level meteorology.
- (iii) Implement a search algorithm to find  $b_{JV}$  that minimises the function above for  $N_{eff}/A_{n,5d}$ . Here we use the Golden Search Algorithm (Press et al., 1993).
- (iv) Insert a call to the optimisation algorithm at the end of each day, at the point in the code where  $V_{cmax,0}$  and  $J_{max,0}$  are being returned from the CASA-CNP biogeochemistry module to the CABLE biophysics module (Figure1) In this way,  $b_{JV}$ , and hence  $V_{cmax,0}$  and  $J_{max,0}$  for sun-lit and shaded leaves are updated daily, based on the leaf environment of the last five days.

#### **Comment 1.8**

P11, L37-38. I read this sentence as if it is impossible for a natural grassland to become a forest. I agree this is probably not the most common land cover change but I was a bit surprised to see this transition being excluded.

#### **Response 1.8**

That is correct. It is an assumption of our parsimonious approach which is now explicit in the text : “For simplicity, we neglect transitions from natural grass land to forest.”

#### **Comment 1.9**

P13, Section 5 e.f. Most of the results are descriptive. The authors often claim that the match between simulations and observations is “good” or “acceptable”. I still need to meet the first modeler who

would claim otherwise. All subjective statements should be removed unless the authors can establish an objective scale of “poor”, “acceptable”, “good”, “very well”. It is worth to have a look at the method proposed by Murphy et al 2004 (doi:10.1038/nature02771). Have a look at the performance index outlined in their supplementary material. Murphy et al claim that the method gives the chance that the simulations and the observations come from the same population. Isn't that what we want to know?.

#### Response 1.9

We have removed qualitative references in this section and replaced with absolute differences between modeled and obs-based latitudinal profiles:

“CABLE and the LandFlux latitudinal profile of ET differ by a mean absolute error of 0.12 mm d<sup>-1</sup>”

“CABLE and FLUXNET estimates of the latitudinal distribution of GPP differ by mean absolute error of 147 gCm<sup>-2</sup>y<sup>-1</sup>.”

“The CABLE and GEOCARBON latitudinal biomass estimates differ by mean absolute error of 0.47 PgCdeg<sup>-1</sup>.”

“Latitudinal profiles of soil carbon from CABLE (total soil carbon and litter) differs from the HWSDA product by a mean absolute error of 1.8 PgCdeg<sup>-1</sup> (Figure 2(xii)), and the CABLE global total of 1426 PgC is 7% higher than the HWSDA estimate of 1329 PgC.”

#### Comment 1.10

P13, L18. Many of the sections start with a single sentence paragraph. This hampers the readability of the text. This sentence often simply rephrased the caption. It would improve the text flow to use the first paragraph to explain/remind the reader to the significance of the analysis. Why are we, for example, looking at evapotranspiration rather than sensible heat? If the model does a good job in simulating evapotranspiration, which applications could the model be used for?

#### Response 1.10

We have extended the opening paragraph of Section 5.1 as follows:

“Model-data comparisons of spatial distributions of key fluxes and stocks are presented in Figure 3. We choose to evaluate the model against GPP, biomass and soil carbon because these are key quantities that are critical constraints on the global terrestrial carbon cycle and for which global distributions are available. We include evapotranspiration (ET) here as it is a key constraint on GPP, because both ET and GPP are regulated by stomatal conductance.”

#### Comment 1.11

P13, L28. Write EBL in full. This kind of acronyms hamper readability.

#### Response 1.11

Done

#### Comment 1.12

P16, Section 5.3. This section is in the validation section. It is not a validation as the result is not compared to observational products or other simulations. The title is correct in stating it is an illustrative example. Add a single sentence explaining why you show these examples. How do they help to understand the next analysis?

#### Response 1.12

We appreciate the suggestion, and have extended the opening paragraph of Section 5.3 as follows:

“Four examples of contrasting regional land-use histories (0.5° x 0.5° grid cells) are presented to illustrate carbon pool changes and the rate of land-atmosphere carbon flux from 1860-present (Figure 5). The landscape-scale responses reveal details that are obscured in the subsequent aggregation to regional and global scale (Section 5.4), but are important for demonstrating the functionality of the model at the spatial scale at which it is applied.”

P16, L28. Write PNG in full. I assumed it is Papua New Guinea.

#### Comment 1.13

P16, L28. Write PNG in full. I assumed it is Papua New Guinea.

#### Response 1.13

Done

#### Comment 1.14

P18, Figure. The coordinates of the sites could go into the text.

#### Response 1.14

We chose to retain the coordinates in the figure.

**Comment 1.15**

P19, L20. It looks like the number preceding 106 km<sup>2</sup> is missing. If not, please, write 1.0 x 106 km<sup>2</sup> for consistency.

**Response 1.15**

1.0 has been inserted.

**Comment 1.16**

P19, L38. It is stated that the  $F_{ccxL}$  is large. Is this confirmed by observations? I assume the evidence to look for would be observations showing increasingly faster regrowth of secondary forest.

**Response 1.16**

We have modified this sentence to emphasise that this term is dominated by the loss of additional sink capacity, which is not observable:

“While the  $F_{cc}$  term dominates the sink, no sink or source term is negligible, and the  $F_{ccxL}$  term (itself dominated by the loss of additional sink capacity) is large, pointing to the need to model the effects of land-use, climate and CO<sub>2</sub> on terrestrial carbon stocks explicitly and simultaneously, as we have done here.”

**Comment 1.17**

P23, L18. See comment for P13, L18.

**Response 1.17**

We now open Section 5.7 with these sentences to enhance readability:

“Key functions of global terrestrial biosphere models such as CABLE attribution and projection of the global net land carbon sink. Therefore we assess CABLE predictions against observation-based estimates of this important quantity.”

**Comment 1.18**

P24, L1. Delete “a” from “a simulates”.

**Response 1.18**

Done

**Comment 1.19**

P26, L8-9. Please, expand your thoughts and be more specific. Which variable should be benchmarked, which data streams do you intend to use for model-data fusion?

**Response 1.19**

We have extended this paragraph as follows:

Further work on the model configuration presented here should include formal benchmarking in the International Land Model Benchmarking Project framework (Hoffman et al., 2017) and model-data fusion (Trudinger et al., 2016). The latter would aim to quantify data constraints on the regional and process attribution of the global land carbon sink using multiple parameter sets that are consistent with the observations, in the same way that Trudinger et al. (2016) did for the Australian region. Data for this task would comprise observation-based constraints presented in this work, extended for example to include remotely-sensed vegetation cover.

## Reviewer 1

### Comment 2.1

Haverd et al present a set of updates to the CABLE model, including the "Populations Order Physiology" (POP) model representation of land use, an algorithm depicting photosynthetic optimality principles, and several other updates presented as appendices.

Numerous integrations of the model with different land use and climate drivers are presented, along with a comprehensive model evaluation exercise. While this is a substantial paper that should almost certainly ultimately be published, and while it includes many interesting a novel benchmarking approaches that the land surface modeling community would do well to take notice of any repeat with other models, I find this version of the manuscript in need of considerable work in terms of the model description presented and in terms of discussion of the uncertainties inherent in both the POP approach and the other updates.

### Response 2.1

We thank the reviewer for the positive comments. We trust that our responses to the previous review and the comments that follow satisfy the request for considerable work.

### Comment 2.2

Firstly, the authors rather over-zealous 'selling' of the POP concept in the manuscript strikes me as not particularly objective and thus quite unconvincing. Further, given the lack of critical discussion of the approach, I am left unsure in which circumstances POP might act as an appropriate simplification, and those in which it would not. For example, there is no discussion of how PFT competition might be represented in this framework, nor of how it would respond to the implementation of partial disturbance processes. The somewhat heuristic and undocumented disaggregation of grid cell fluxes into patches and cohorts (which is the critical central assumption) is also presented without any consideration of whether it is realistic or appropriate. I realize that it is imperative to illustrate in some way the basic competence of an LSM, in order to allow the following experiments to be seriously analyzed, but this must be balanced with some humility about how much can really be read into the conclusions, given the vast difficulties of parameterization and appropriate validation of these models.

### Response 2.2

The POP approach has been extensively described and evaluated in three earlier manuscripts, and its limitations noted. We make it clear that the description here is a summary of what is in those earlier papers. We consider the text in Section 3.1 to be an objective summary of how POP works.

### Comment 2.3.

Secondly, the model description is inadequate and confusing throughout much of the methods section. I have detailed specific instances of this below, but in general, the description is vague, not accompanied with technical equations nor any accompanying documentation, and is not up the standards that are found within a typical GMD article. I suggest that this section needs completely re-writing with transparency and provenance tracking in mind. In my view it requires a full separate technical note to allow proper assessment of the methods employed, which again, would be normal practice within GMD.

### Response 2.3.

We made substantial changes to the methods to clarify the model description and provenance of model developments in the context of previous work. Please see responses 1.3 and 1.7 above for more details, and the new Figure 1 concisely summarizing model components and developments.

### Comment 2.4.

Thirdly, the manuscript focuses in great detail on the POP land use and the photosynthetic optimization modifications, then almost ignores the other myriad of modifications that have been made to the model. Why are these two modifications selected for special treatment? Maybe there is a good reason, but it needs to be made clearer.

### Response 2.4.

There was an intention to split the model development description into two sections to clearly distinguish: (i) implementation of existing parameterisations from the literature (i.e. those described in the Appendix) to those that (ii) required a higher degree of originality. We have made this clearer in the introduction:

“Additional model updates based on existing parameterisations from the literature include: (i) drought and summer-green phenology (Sitch et al., 2003; Sykes et al., 1996); (ii) low-



temperature reductions in photosynthetic rates in boreal forests (Bergh et al., 1998); (iii) photo-inhibition of leaf day-respiration (Clark et al., 2011); and (iv) acclimation of autotrophic respiration (Atkin et al., 2016). These are described in Appendix 1.”

#### **Comment 2.5**

Lastly, the paper is essentially presents a new version of CABLE with many updates, but the performance of this new version in contrast to any previous versions is not considered and the impact of the implementation of the different model features is in general ignored, nor is the performance compared to any other LSM. Thus, the skill of this model version is presented in isolation, and is quite difficult to assess other than broadly stating that it performs reasonably well.

#### **Response 2.5**

We consider that comparison of model simulations with observation-based data carries more weight than with other models or model versions. The reviewer notes (Comment 2.1) that this paper “includes many interesting and novel benchmarking approaches that the land surface modeling community would do well to take notice of any repeat with other models.”

We could not meaningfully compare earlier versions of CABLE with global biomass or soil carbon because these stocks are heavily dependent on land-use change which was not represented in earlier versions of CABLE. Also, earlier versions of CABLE could not make use of data pertaining to age-dependent biomass accumulation (Section 5.2) because they lacked tree demography.

Isolating every change and assessing its impact was deemed out of scope for this work, and would not be a productive exercise. For example, it would be of limited use to assess CABLE with LUC switched on and off, since many other studies have already demonstrated that LUC is responsible for huge perturbations to the historic carbon cycle. In the case of the  $J_{max}/V_{cmax}$  optimization, we do indeed show results with and without the optimization (Figures 8 and 9).

In the case of the many other changes introduced (Appendix 1), we are relying on established algorithms which have been tested in isolation by their developers (although not of course in CABLE). It is the combined impact of all the changes that is important for this paper, the purpose of which is to document this new version of the model.

#### **Comment 2.6**

P1 L5: Critical for what?

#### **Response 2.6**

We have deleted “critical”.

#### **Comment 2.7**

P1 L15: This theory has been proposed previously (Xu et al. 2012), so is not novel

#### **Response 2.7**

The approach of Xu et al. (2012) is different from our dynamic optimization approach: that of Xu et al. “equalizes”  $W_c$  and  $W_j$  (although the timescale of this equalization is not obvious), whereas we dynamically minimize the N-cost of photosynthesis, resulting in approximately equal contributions of  $W_c$  and  $W_j$  to net photosynthesis.

We now reference Ali et al. (2016) and Xu et al. (2012) in the introduction:

“Its advantages as an approach to modelling photosynthetic dynamics using limited data constraints was pointed out by Wang et al. (2017), while Ali et al. (2016) have incorporated it into a global mechanistic model of photosynthetic capacity, based on the optimal nitrogen allocation model of Xu et al. (2012).”

#### **Comment 2.8**

P1 L21: “state of the art” is jargon and should be replaced by a statement with some clear scientific meaning.

#### **Response 2.8**

We have removed this phrase. The sentence now reads:

“These new developments enhance CABLE’s capability for use within an Earth System Model, and in stand-alone applications to attribute trends and variability in the terrestrial carbon cycle to regions, processes and drivers.”

#### **Comment 2.9**

P1 L25: I wasn’t aware that we had any credible estimates of global GPP, let alone centennial trends therein.

### Response 2.9

Please see our references to Campbell et al. 2017 (Section 5.6) for the COS-estimates of the trend in global GPP.

### Comment 2.10

P3 L8: These two developments seems quite arbitrary and distinct from one another. Why are they the joint focus of this one paper?

### Response 2.10

They are both important for global terrestrial carbon balance, which is the focus of the model evaluation. Please also see the sentence in Response 2.8 above.

### Comment 2.11

P3 L10: Now there is a new list of developments. Why is this list different from the last list?

### Response 2.11

Please see Response 2.4 clarifying model developments.

### Comment 2.12.

P3 L33: “second generation” in what sense?

### Response 2.12

We have replaced this descriptor with “demography-enabled”

### Comment 2.13

P3 L36: Many current DGVM models using some sort of similarity clustering to deal with the problem of expanding numbers of disturbances classes to track. (see all implementations of ED...) This might be difficult, but it is nonetheless the ‘state of the art’, if we are going to use that sort of terminology.

### Response 2.13

We stated that POP presents a simpler approach to dealing with this problem and removed ‘state-of-the-art’ phrases in the manuscript.

### Comment 2.14

P4 L5: POP has some advantages in terms of computational time, but the rules used to disaggregate the big leaf fluxes into size classes of vegetation are necessarily arbitrary. There has not been, as far as I know, any attempt to investigate the uncertainty introduced by not resolving vertical light partitioning in POP. Thus, it is not clear to me that is all that useful of an idea.

### Response 2.14

The latest version of POP (as described in Haverd et al. 2016) partitions stem biomass increment as already described in Section 3.1, and does now account for the vertical light partitioning: “In the current implementation of POP, the annual stem biomass increment is partitioned among cohorts and patches in proportion to current net primary production of the given cohort. For this purpose, gross primary production and autotrophic respiration are passed from CABLE to POP, and each is partitioned amongst patches and cohorts. Gross resource uptake is partitioned amongst cohorts and patches in proportion to light interception, evaluated from vertical profiles of gap probabilities, computed using the CABLE maximum leaf area, distributed amongst patches and cohorts in proportion to sapwood area. Leaf, fine-root and sapwood respiration components are also partitioned amongst cohorts and patches, according to the size of each biomass component. Cohort-specific sapwood is prognosed by assuming sapwood conversion to heartwood at a rate  $0.05 \text{ y}^{-1}$ . Cohort-specific leaf and root carbon pools are estimated by partitioning the grid-cell values in proportion to leaf area index (LAI). Net resource uptake for each patch and cohort is evaluated as its gross primary production minus autotrophic respiration.”

To be clear that this contrasts with the original algorithm, we modified the introductory paragraph to Section 3.1:

“To enable the extension of CABLE to simulate dynamic land use and implications for forest carbon uptake, we used the most recent version of POP’s representation of growth partitioning amongst age/size classes (cohorts) of trees established in the same year that accounts for both cohort-dependent light interception and sapwood respiration. This contrasts with the original growth partitioning which assumed that individuals capture resources in varying proportion to their size.”



To assess whether POP is “a useful idea”, we have already noted that it has been: “demonstrated to successfully replicate the effects of rainfall and fire disturbance gradients on vegetation structure along a rainfall gradient in Australian savannah – the Northern Australian Tropical Transect (Haverd et al., 2013c; Haverd et al., 2016b), and leaf-stem allometric relationships derived from global forest data, which may be argued to reflect the simultaneous development of trees in closed forest stands in terms of structural and functional (productivity) attributes (Haverd et al., 2014).”

We further evaluate POP’s predictions of age effects on biomass accumulation for boreal, temperate and tropical forests in the current work (Section 5.2).

#### **Comment 2.15**

P4 L 12: As above, this idea was also proposal by Xu et al. (2012) and it’s global implementation presented by Ali et al. (2016)

#### **Response 2.15**

Please see Response 2.7, additional references and clarification has been added.

#### **Comment 2.16**

P5 L11: Define what is meant by ‘offline’ in this context?

#### **Response 2.16**

We have replaced “offline” with “using prescribed meteorology”.

#### **Comment 2.17**

P5 L27: This sentence is really just hype and doesn’t add anything of scientific value to the paper.

#### **Response 2.17**

We disagree: the sentence “POP is designed to be modular, deterministic, computationally efficient, and based on defensible ecological principles.” summarises the design principles of the POP module.

#### **Comment 2.18**

P5 L30: If the timestep is one year, how is the growth of leaf tissue, and disturbance events from individual fires resolved with appropriate fidelity?

#### **Response 2.18**

The time-steps for all the processes is much clearer now with our new Figure 1. Growth of leaf tissue is resolved daily. Fire is not implemented in this version of the model.

#### **Comment 2.19**

P5 L31: Input variables to POP, not CABLE, I assume.

#### **Response 2.19**

We now clarify “input variables to POP”.

#### **Comment 2.20**

P5 L35: Surely neglecting partial disturbance from fires and mortality will introduce a large bias? How can this decision be justified?

#### **Response 2.20**

We do not neglect mortality. Fire is not explicit, but implicit in the catastrophic disturbance that is imposed. We are still working on implementation of fire, as flagged in the final paragraph of the paper.

#### **Comment 2.21**

P5 L37: Need to define the nature of a ‘cohort’ here. Are they all of similar height, age, dbh? Similarly, are the ‘patches’ spatially explicit or implicit? To what does the term ‘neighborhoods’ refer?

#### **Response 2.21**

We have removed ‘neighbourhoods’ (interchangeable with ‘patches’). This paragraph has been modified as:

“State variables are the density of tree stems partitioned among cohorts of trees and representative patches of different age-since-last-disturbance across a simulated landscape or grid-cell. Each patch has a number of cohorts. Trees in each cohort are the same age and size

because they are established simultaneously and share the same growth rate. Patches are not spatially explicit. Their areal representation in the landscape is given by the patch age distribution.”

#### **Comment 2.22**

P6 L1: Does this just mean that stem biomass is a fixed fraction of NPP?

#### **Response 2.22**

No. Stem biomass is the outcome of growth and mortality processes, aggregated over cohorts and patches. Mortality is described in the following paragraph.

#### **Comment 2.23**

P6 L2: GPP and Ra at the grid-scale level?

#### **Response 2.23**

Yes, amended to “gross primary production and autotrophic respiration for each woody tile”.

#### **Comment 2.24**

P6 L3-6: This is not an adequate description of the disaggregation process, which is the most important assumption in this POP system. How are gap probabilities evaluated? How is light interception of the different cohorts and patches evaluated? With what set of assumptions? I think the authors would do well, if they genuinely wish this approach to become more broadly accepted, to apply some more critical thinking to this particular aspect of the model and to be much more transparent with the limitations and strengths of the assumptions here. Maybe it is defensible to assume that NPP is directly proportional to light interception, or maybe it isn't, but the absence of discussion and questioning of this topic is frustrating. I was a referee on the original POP paper too, and continue to find this to be a limiting aspect of this exercise.

#### **Response 2.24**

First, we are assuming GPP (not NPP) is proportional to light interception. This is stated clearly in the manuscript.

We agree that the use of gap probabilities and related light interception to partition GPP is too brief and have expanded as follows:

“In the current implementation of POP, the annual stem biomass increment is partitioned among cohorts and patches in proportion to current net primary production of the given cohort (Haverd et al., 2016b). For this purpose, gross primary production and autotrophic respiration for each woody tile are passed from CABLE to POP, and each is partitioned amongst patches and cohorts. Gross resource uptake is partitioned amongst cohorts and patches in proportion to light interception, which is evaluated for each cohort as the difference between downward-looking gap probabilities above and below each cohort. Gap probabilities are calculated using the geometric approach of Haverd et al. (2012). This requires estimates of cohort-specific crown cross-sectional area (related allometrically to DBH) and LAI, computed using the CABLE maximum leaf area, distributed amongst patches and cohorts in proportion to sapwood area. For autotrophic respiration: leaf, fine-root and sapwood respiration components are also partitioned amongst cohorts and patches, according to the size of each biomass component. Cohort-specific sapwood is prognosed by assuming sapwood conversion to heartwood at a rate  $0.05 \text{ y}^{-1}$ . Cohort-specific leaf and root carbon pools are estimated by partitioning the aggregate values for each woody tile in proportion to leaf area index (LAI). Net resource uptake for each patch and cohort is evaluated as its gross primary production minus autotrophic respiration. “

#### **Comment 2.25**

P6 L11: I thought there was only catastrophic disturbance?

#### **Response 2.25**

We have removed “according to disturbance intensity”, since partial disturbance is not considered in this work.

#### **Comment 2.26**

P6 L13: There should, at the very least, be a reference to the place where one can find an actual description of this mortality function. Growth efficiency is often also defined as  $\text{NPP}/\text{LAI}$  (in LPJ, for example). Hence this needs more careful definition. There is no description at all of how the crowding

mortality works.

**Response 2.26**

References for growth efficiency and crowding mortality have been inserted.

**Comment 2.27**

P6 L 17: In what sense are the patches ‘replicates’?

**Response 2.27**

We agree this is confusing. “replicate” has been removed.

**Comment 2.28**

P6 L24: How are the state variables interpolated? This sentence doesn’t make sense to me, nor does the one that follows. Is this a new feature of POP? In which case, it needs much, much clearer documentation.

**Response 2.28**

This interpolation is not a new feature of POP. We have modified the text to be clearer:

“To account for disturbances and the resulting landscape structure, state variables of patches of different ages are linearly interpolated between ages, and weighted by probability intervals from the negative exponential distribution. The resultant weighted average of, for example, total stem biomass or annual stem biomass turnover, is taken to be representative for the grid-cell as a whole.”

**Comment 2.29**

P6 L30: “The resulting tree biomass turnover” : resulting from what? The combination of the mortality rates discussed above?

**Response 2.29**

This sentence has been clarified as:

“The POP biomass lost by mortality is applied as an annual decrease in the CASA-CNP tree biomass pool, and replaces the default fixed biomass turnover rate.”

**Comment 2.30**

P6 L32: Thus far the distinction of how CASA-CNP and CABLE interact has not been made clear.

**Response 2.30**

This is now clear in Figure 1.

**Comment 2.31**

P6 L35: Is this a feature of POP, or of CASA-CNP?

**Response 2.31**

Clarified as:

“Sapwood replaces stem-wood biomass in the CASA-CNP calculation of stem respiration.”

**Comment 2.32**

P6 L36: I thought NPP, GPP and Ra were all calculated at the grid scale level, so how can NPP thus be dependant on stand age?

**Response 2.32**

This line is only true if the woody tile has a uniform age distribution. We have modified the text to read:

“These feedbacks of POP structural variables on leaf area and autotrophic respiration result in net primary production that reflect the area-average sapwood area and mass of each woody tile.”

**Comment 2.33**

P7 L 12: What is a biome in this context? Is each grid cell really only populated by one or two PFTs?

**Response 2.33**

We have clarified the definition:

“Biomes (combinations of dominant plant types (Prentice et al., 1992)) are mapped...”

Yes, as stated, the biomes (one per grid-cell) are each mapped to one or two CABLE pfts.

**Comment 2.34**

P8 L5: How many age classes are there? Is this dynamic or fixed?

#### Response 2.34

We have inserted the following text: “POPLUC represents integral secondary forest ages classes from 0 to 1000 y old inclusive. This is fixed, although many ages may have a weight of zero. The frequency distribution is fully dynamic.

In contrast POP represents 60 patches in each woody tile, spanning a distribution of ages from 0 to 1000. “

#### Comment 2.35

P8 L10: I don't think the description in section 3.1 was sufficient to let the reader understand how this interacts with the age structure tracking in secondary forests.

#### Response 2.35

Agreed. This is confusing. As now detailed in Figure 1, the POPLUC module supplies POP with the secondary forest patch age distribution. We have amended the text as follows:

“The POPLUC code provides the secondary forest patch age distribution to POP. POP tracks biomass in each of a set of patches with different ages,, based on patch-dependent growth and turnover. It then interpolates biomass in the simulated patches to give biomass in each integral age class represented by the secondary forest tile patch age distribution.”

#### Comment 2.36

P8 L14: typo in ‘pools’

#### Response 2.36

Fixed.

#### Comment 2.37

P9 L5: Again, this seems like a huge shift in focus from land use and demography to fast timescale photosynthesis. Further, a very similar method was suggested by the studies of Xu, and Ali.

#### Response 2.37

Please see Response 2.7.

#### Comment 2.38

P11 L23: So, shouldn't the BGC model be CASA-CN, not CASA-CNP?

#### Response 2.38

Although the P-cycle was disabled, CASA-CNP is still the name of the BGC model.

#### Comment 2.39

P11 L31: Which version of CRU-NCEP are you using here?

#### Response 2.39

V7: now noted.

#### Comment 2.40

P12 L9: None of these scenarios explores the impact of the photosynthetic optimization approach that you just documented in considerable detail? This happens later, but that is mixing of methods and results and is confusing.

#### Response 2.40

We now pre-empt this:

“In addition to the above scenarios, we also explored the impact on global GPP of dynamically optimizing  $b_{JV} = J_{\max,0} / V_{\max,0}$ . Simulations were performed under assumptions of dynamically optimized and fixed  $b_{JV}$  (values of 1.6, 1.7, 1.8). For these simulations, static 1860 land-cover was assumed and for computational efficiency, simulations were based on a sample of 1000 randomly distributed grid-cells across the global ice-free land-surface.”

#### Comment 2.41

P15 L4: From where are these successional data taken? Surely there is massive geographical/climatic variance in these rates? Is the model sampled to make sure that it has the same climatic regimes as the dataset?

#### Response 2.41

As stated in the text, the sampling is only approximate:

“CABLE regrowth rates of secondary forests in the Tropical Rainforest, Tropical Seasonal Forest and Tropical Dry Forest/Savanna biomes (Figure 1) in South America.... observation-based estimates by Poorter et al. (2016) from 1500 forest plots at 45 sites spanning the major environmental gradients across the Neotropics (Figure 4).”

We plot the observed and modeled 20-y biomass accumulation against mean annual precip, because Poorter et al. established this as the strongest environmental predictor. We add this clarification:

“... Neotropics, where mean annual rainfall is the strongest environmental predictor of biomass accumulation after 20 y (Poorter et al., 2016).”

**Comment 2.42**

P16 L27 : Papua New Guinea??

**Response 2.42**

Fixed.

**Comment 2.43**

P26 L10: Arguably, if one is going to say ‘state of the art’, this model should already include fire effects on vegetation, croplands and dynamic biogeography and PFT interactions already, since those are things that are included in many other models. Saying a model is the ‘state of the art’ is a bold statement, given both the complexity and the wide range of approaches within this field. Further, it is not really necessary for the purpose of model documentation. All LSMs have strengths and weaknesses in different areas. Progress can only be made by careful and objective analysis of the uncertainties inherent in different types of structural assumption, parameters and boundary conditions. I found this paper somewhat lacking in any thoughtful discussion of these things, whether the model is ‘state of the art’ or not.

**Response 2.43**

Both uses of ‘state of the art’ (in the Abstract and Conclusion) have been removed.
